# Supplementary material for: Promotion of DNA Adsorption onto Microplastics by Transition Metal Ions
Source: MDPI journal article supplement (doi:10.3390/microplastics2010012), 2023-03-06
Supplement: s1 [file s1]

# Supporting Information

## Promotion of DNA Adsorption onto Microplastics by Transition Metal Ions

Lyuyuan Wu, Kshiti Patel, Mohamad Zandieh, and Juewen Liu\*

Department of Chemistry, Waterloo Institute for Nanotechnology, Water  
Institute, University of Waterloo, Waterloo, Ontario, N2L 3G1, Canada

\* Authors to whom correspondence should be addressed

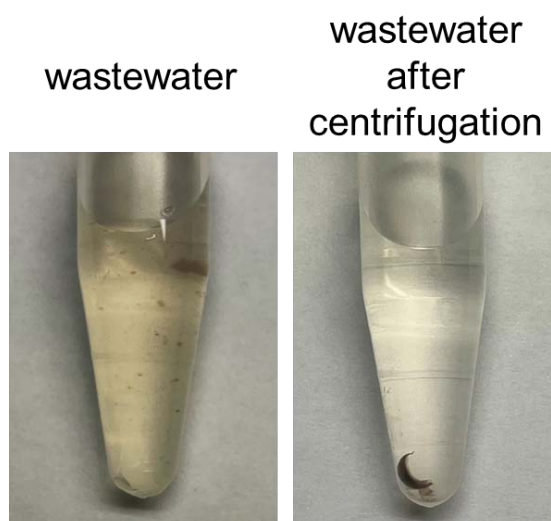

**Figure S1.** Photographs depicting the wastewater sample before and after centrifugation (1000 rpm, 2 min).

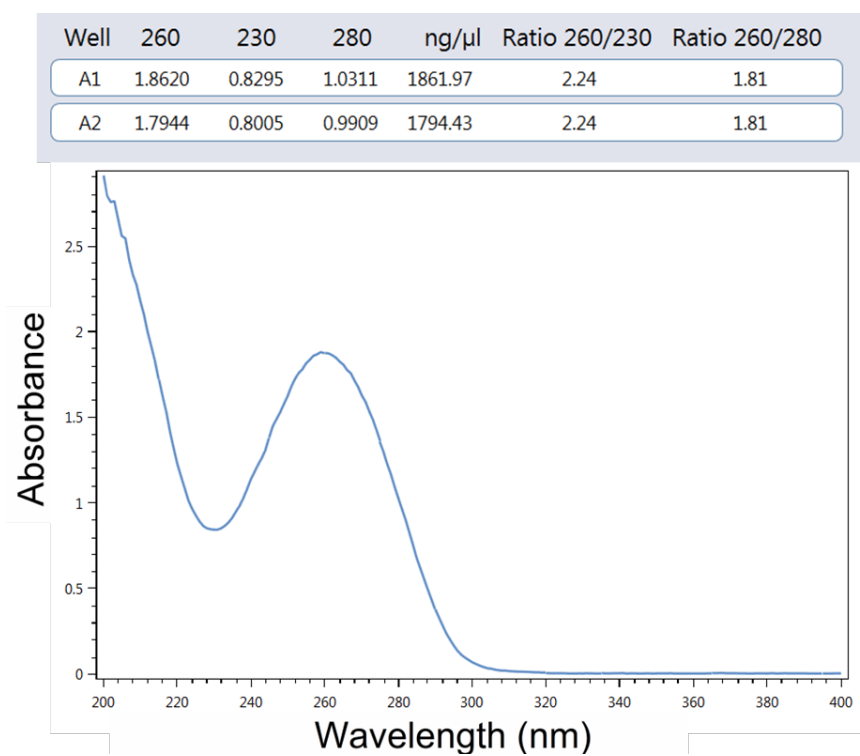

**Figure S2.** The UV-vis spectrum of purified dsDNA.

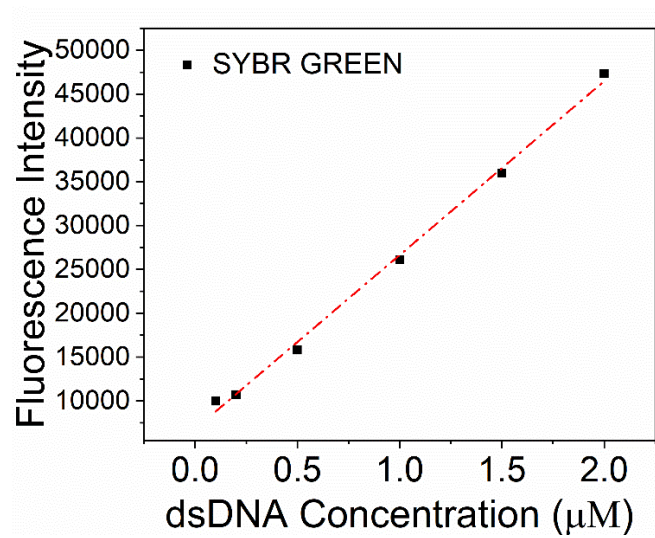

**Figure S3.** SGI-based calibration of dsDNA concentration.

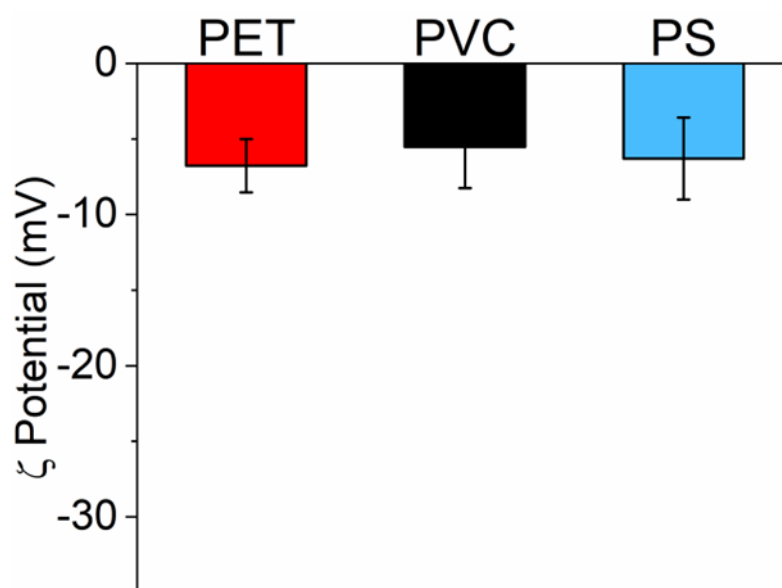

**Figure S4.** ζ-Potentials of 500 μg/mL of the microplastics in a buffer (10 mM HEPES, pH 7.6) in the presence of 1 mM  $\text{Zn}^{2+}$ . The presence of  $\text{Zn}^{2+}$  made the surface charges less negative (compare to Figure 2A of manuscript).
